# Supplementary material
Source: PubMed Central journal article supplement (PMC3647933)
Supplement: JCM.00449-13_zjm999092466so1.pdf [file JCM.00449-13_zjm999092466so1.pdf]

**Supplemental Table 1:** Bacteria used for specificity evaluation

| <b>Isolate species</b>              | <b>Code</b> |
|-------------------------------------|-------------|
| <i>Escherichia coli</i>             | ATCC 25922  |
| <i>Pseudomonas aeruginosa</i>       | ATCC 27853  |
| <i>Klebsiella pneumoniae</i>        | ATCC 700603 |
| <i>Staphylococcus aureus</i>        | ATCC 25923  |
| <i>Enterococcus faecalis</i>        | ATCC 29212  |
| <i>Streptococcus pneumoniae</i>     | ATCC 49619  |
| <i>Acinetobacter baumannii</i>      | ATCC 17978  |
| <i>Proteus mirabilis</i>            | ATCC 29906  |
| <i>Bacteroides thetaiotaomicron</i> | ATCC 29741  |
| <i>Prevotella bivia</i>             | *AN528      |
| <i>Prevotella melaninogenica</i>    | AN574       |
| <i>Bacteroides ovatus</i>           | AN540       |
| <i>Bacteroides capillosus</i>       | AN584       |
| <i>Bacteroides uniformis</i>        | AN559       |
| <i>Bacteroides vulgates</i>         | AN587       |
| <i>Fusobacterium nucleatum</i>      | AN572       |
| <i>Fusobacterium necrophorum</i>    | AN547       |
| <i>Clostridium perfringens</i>      | AN590       |
| <i>Porphyromonas endodontalis</i>   | AN548       |

\*All anaerobic isolates with the AN designation were obtained from the National Collection of Anaerobic Bacteria (part of the Hellenic Study Group for Anaerobic Infections initiative), Dept. of Microbiology, Laikon General Hospital, 11527, Athens, Greece.
